# Supplementary material for: The 3D Organization of the Yeast Genome Correlates with Co-Expression and Reflects Functional Relations between Genes
Source: PubMed Central journal article supplement (PMC3561378; doi:10.1371/journal.pone.0054699), 2013-01-31

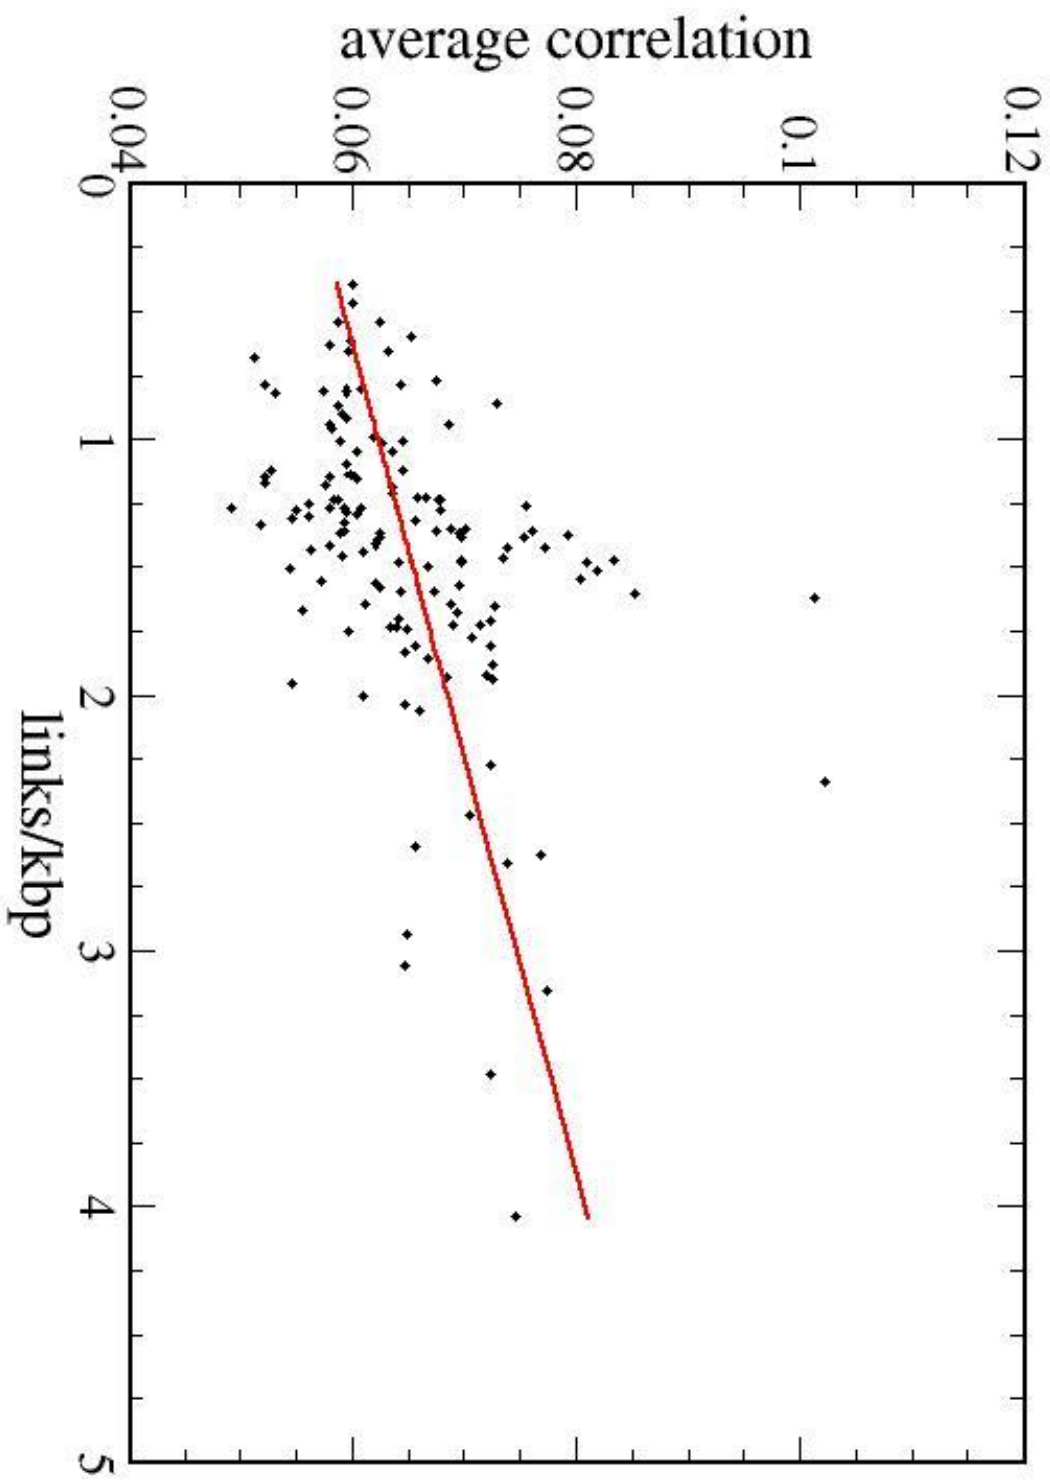

Supplement: pone.0054699.s002.pdf [file pone.0054699.s002.pdf]
