# Supplementary material for: The 3D Organization of the Yeast Genome Correlates with Co-Expression and Reflects Functional Relations between Genes
Source: PubMed Central journal article supplement (PMC3561378; doi:10.1371/journal.pone.0054699), 2013-01-31
Supplement: pone.0054699.s009.pdf [file pone.0054699.s009.pdf]

## (A) Molecular Function

|                                     | Frequency > 4 |          |         | Frequency > 5 |          |         | Frequency > 6 |          |         | Frequency > 7 |          |         | Frequency > 8 |          |         | Frequency > 9 |          |         |
|-------------------------------------|---------------|----------|---------|---------------|----------|---------|---------------|----------|---------|---------------|----------|---------|---------------|----------|---------|---------------|----------|---------|
|                                     | observed      | expected | Z-score | observed      | expected | Z-score | observed      | expected | Z-score | observed      | expected | Z-score | observed      | expected | Z-score | observed      | expected | Z-score |
| molecular function                  | 26484         | 34034    | -4      | 22940         | 29664    | -4      | 13659         | 17907    | -3      | 8485          | 11315    | -3      | 5434          | 7375     | -3      | 3538          | 5017     | -3      |
| hydrolase activity                  | 4168          | 2748     | 4       | 3688          | 2396     | 4       | 2308          | 1464     | 3       | 1490          | 926      | 3       | 1023          | 592      | 3       | 718           | 407      | 3       |
| transferase activity                | 2585          | 2001     | 2       | 2232          | 1736     | 2       | 1321          | 1053     | 1       | 834           | 660      | 1       | 521           | 436      | 0       | 345           | 297      | 0       |
| protein binding                     | 1591          | 1268     | 1       | 1418          | 1093     | 1       | 863           | 663      | 1       | 549           | 419      | 1       | 379           | 273      | 1       | 279           | 186      | 1       |
| transporter activity                | 960           | 595      | 3       | 828           | 524      | 2       | 480           | 313      | 2       | 294           | 197      | 1       | 182           | 130      | 1       | 118           | 86       | 1       |
| DNA binding                         | 588           | 505      | 0       | 510           | 442      | 0       | 310           | 267      | 0       | 189           | 168      | 0       | 114           | 109      | 0       | 73            | 73       | 0       |
| structural molecule activity        | 300           | 501      | -2      | 249           | 433      | -2      | 143           | 260      | -1      | 91            | 163      | -1      | 47            | 108      | -1      | 29            | 73       | -1      |
| transcription regulator activity    | 556           | 439      | 1       | 472           | 384      | 1       | 286           | 232      | 0       | 183           | 146      | 0       | 122           | 95       | 0       | 89            | 65       | 1       |
| oxidoreductase activity             | 345           | 320      | 0       | 303           | 273      | 0       | 194           | 166      | 0       | 120           | 106      | 0       | 79            | 67       | 0       | 59            | 47       | 0       |
| RNA binding                         | 179           | 206      | 0       | 161           | 182      | 0       | 88            | 109      | 0       | 51            | 67       | 0       | 39            | 45       | 0       | 24            | 31       | 0       |
| enzyme regulator activity           | 183           | 192      | 0       | 168           | 165      | 0       | 117           | 101      | 0       | 69            | 64       | 0       | 43            | 41       | 0       | 24            | 27       | 0       |
| ligase activity                     | 216           | 131      | 2       | 197           | 114      | 2       | 124           | 68       | 2       | 79            | 43       | 2       | 51            | 28       | 1       | 29            | 19       | 0       |
| protein kinase activity             | 103           | 69       | 1       | 90            | 60       | 1       | 53            | 36       | 1       | 35            | 23       | 1       | 23            | 15       | 0       | 12            | 10       | 0       |
| peptidase activity                  | 72            | 52       | 1       | 60            | 46       | 0       | 38            | 28       | 0       | 23            | 17       | 0       | 19            | 11       | 1       | 16            | 7        | 1       |
| lyase activity                      | 33            | 30       | 0       | 27            | 26       | 0       | 18            | 16       | 0       | 9             | 9        | 0       | 8             | 6        | 0       | 6             | 4        | 0       |
| helicase activity                   | 48            | 28       | 1       | 46            | 24       | 1       | 35            | 15       | 2       | 18            | 9        | 1       | 15            | 6        | 1       | 12            | 4        | 2       |
| lipid binding                       | 18            | 21       | 0       | 14            | 19       | 0       | 9             | 11       | 0       | 6             | 7        | 0       | 4             | 4        | 0       | 2             | 3        | 0       |
| nucleotidyltransferase activity     | 12            | 18       | 0       | 10            | 16       | 0       | 1             | 9        | -1      | 0             | 5        | -1      | 0             | 3        | 0       | 0             | 2        | 0       |
| isomerase activity                  | 19            | 13       | 0       | 17            | 11       | 0       | 10            | 7        | 0       | 8             | 4        | 1       | 6             | 2        | 1       | 4             | 2        | 0       |
| phosphoprotein phosphatase activity | 13            | 10       | 0       | 12            | 8        | 0       | 7             | 5        | 0       | 5             | 3        | 0       | 4             | 2        | 0       | 3             | 1        | 1       |
| signal transducer activity          | 16            | 8        | 1       | 14            | 7        | 1       | 7             | 4        | 0       | 7             | 2        | 1       | 6             | 1        | 2       | 4             | 1        | 1       |
| motor activity                      | 1             | 0        | 0       | 1             | 0        | 0       | 0             | 0        | 0       | 0             | 0        | 0       | 0             | 0        | 0       | 0             | 0        | 0       |
| transcription regulator activity    | 0             | 0        | 0       | 0             | 0        | 0       | 0             | 0        | 0       | 0             | 0        | 0       | 0             | 0        | 0       | 0             | 0        | 0       |

## (B) Biological Process

|                                                        | Frequency > 4 |          |         | Frequency > 5 |          |         | Frequency > 6 |          |         | Frequency > 7 |          |         | Frequency > 8 |          |         | Frequency > 9 |          |         |
|--------------------------------------------------------|---------------|----------|---------|---------------|----------|---------|---------------|----------|---------|---------------|----------|---------|---------------|----------|---------|---------------|----------|---------|
|                                                        | observed      | expected | Z-score | observed      | expected | Z-score | observed      | expected | Z-score | observed      | expected | Z-score | observed      | expected | Z-score | observed      | expected | Z-score |
| biological process                                     | 10854         | 18099    | -5      | 9233          | 15698    | -5      | 5367          | 9500     | -5      | 3285          | 6001     | -4      | 2039          | 3928     | -4      | 1273          | 2675     | -4      |
| RNA metabolic process                                  | 6454          | 5115     | 2       | 5676          | 4483     | 2       | 3480          | 2686     | 2       | 2268          | 1721     | 2       | 1541          | 1118     | 2       | 1089          | 756      | 2       |
| transport                                              | 5785          | 4670     | 2       | 5099          | 4059     | 2       | 3104          | 2440     | 2       | 2043          | 1541     | 2       | 1396          | 1012     | 2       | 986           | 678      | 2       |
| transcription                                          | 2323          | 1608     | 3       | 2047          | 1407     | 3       | 1259          | 852      | 2       | 816           | 536      | 2       | 510           | 351      | 2       | 362           | 233      | 2       |
| response to stress                                     | 2027          | 1424     | 2       | 1785          | 1251     | 2       | 1132          | 746      | 2       | 736           | 478      | 2       | 505           | 313      | 2       | 364           | 210      | 2       |
| protein modification process                           | 1772          | 1304     | 2       | 1561          | 1140     | 2       | 967           | 692      | 2       | 615           | 438      | 1       | 393           | 285      | 1       | 283           | 195      | 1       |
| cell cycle                                             | 2134          | 1239     | 4       | 1870          | 1079     | 4       | 1170          | 650      | 4       | 716           | 411      | 3       | 459           | 267      | 2       | 299           | 184      | 2       |
| DNA metabolic process                                  | 936           | 683      | 2       | 839           | 590      | 2       | 504           | 356      | 1       | 317           | 226      | 1       | 200           | 149      | 1       | 140           | 101      | 1       |
| response to chemical stimulus                          | 981           | 663      | 2       | 810           | 584      | 2       | 483           | 352      | 1       | 308           | 224      | 1       | 192           | 146      | 1       | 130           | 96       | 1       |
| chromosome organization                                | 929           | 648      | 2       | 825           | 572      | 2       | 549           | 342      | 2       | 378           | 217      | 2       | 259           | 142      | 2       | 195           | 95       | 3       |
| translocation                                          | 513           | 625      | 0       | 456           | 547      | 0       | 268           | 327      | 0       | 161           | 208      | 0       | 112           | 136      | 0       | 71            | 93       | 0       |
| vesicle-mediated transport                             | 589           | 538      | 0       | 511           | 476      | 0       | 325           | 284      | 0       | 210           | 182      | 0       | 137           | 118      | 0       | 101           | 81       | 0       |
| ribosome biogenesis                                    | 515           | 498      | 0       | 471           | 431      | 0       | 296           | 260      | 0       | 198           | 165      | 0       | 139           | 107      | 0       | 95            | 72       | 0       |
| mitochondrion organization                             | 249           | 363      | -1      | 229           | 316      | -1      | 146           | 190      | 0       | 99            | 121      | 0       | 70            | 78       | 0       | 51            | 53       | 0       |
| cellular membrane organization                         | 353           | 333      | 0       | 298           | 289      | 0       | 171           | 175      | 0       | 90            | 111      | 0       | 57            | 72       | 0       | 39            | 50       | 0       |
| cellular carbohydrate metabolic process                | 420           | 320      | 1       | 350           | 280      | 1       | 215           | 166      | 1       | 127           | 105      | 0       | 79            | 69       | 0       | 59            | 46       | 0       |
| cellular amino acid and derivative metabolic process   | 376           | 285      | 1       | 331           | 250      | 1       | 198           | 149      | 1       | 100           | 94       | 0       | 58            | 61       | 0       | 34            | 42       | 0       |
| signal transduction                                    | 356           | 221      | 2       | 314           | 190      | 2       | 198           | 114      | 2       | 138           | 72       | 2       | 95            | 47       | 2       | 66            | 31       | 2       |
| cytoskeleton organization                              | 241           | 217      | 0       | 214           | 187      | 0       | 135           | 113      | 0       | 89            | 72       | 0       | 54            | 46       | 0       | 35            | 31       | 0       |
| protein complex biogenesis                             | 159           | 209      | -1      | 144           | 184      | 0       | 91            | 109      | 0       | 72            | 69       | 0       | 52            | 44       | 0       | 45            | 30       | 1       |
| cellular lipid metabolic process                       | 252           | 198      | 1       | 223           | 176      | 0       | 138           | 105      | 1       | 81            | 66       | 0       | 56            | 43       | 0       | 45            | 29       | 1       |
| cellular protein catabolic process                     | 245           | 153      | 2       | 216           | 133      | 2       | 140           | 81       | 2       | 99            | 51       | 2       | 69            | 33       | 2       | 52            | 22       | 2       |
| heterocycle metabolic process                          | 184           | 152      | 0       | 164           | 130      | 0       | 102           | 79       | 0       | 63            | 50       | 0       | 40            | 32       | 0       | 25            | 22       | 0       |
| generation of precursor metabolites and energy         | 128           | 140      | 0       | 102           | 123      | 0       | 61            | 74       | 0       | 41            | 46       | 0       | 24            | 29       | 0       | 16            | 20       | 0       |
| cofactor metabolic process                             | 146           | 127      | 0       | 136           | 110      | 0       | 87            | 66       | 0       | 56            | 42       | 0       | 35            | 27       | 0       | 20            | 19       | 0       |
| cellular component morphogenesis                       | 255           | 127      | 3       | 199           | 111      | 2       | 119           | 65       | 2       | 68            | 41       | 1       | 48            | 26       | 1       | 33            | 18       | 1       |
| meiosis                                                | 188           | 104      | 2       | 170           | 91       | 2       | 98            | 54       | 2       | 60            | 34       | 1       | 30            | 22       | 0       | 18            | 15       | 0       |
| chromosome segregation                                 | 157           | 88       | 2       | 143           | 76       | 2       | 85            | 46       | 2       | 58            | 29       | 2       | 39            | 20       | 1       | 28            | 13       | 1       |
| cellular homeostasis                                   | 109           | 84       | 0       | 97            | 76       | 0       | 52            | 45       | 0       | 37            | 28       | 0       | 27            | 18       | 0       | 16            | 12       | 0       |
| sporulation resulting in formation of a cellular spore | 109           | 73       | 1       | 87            | 62       | 1       | 58            | 39       | 1       | 32            | 24       | 0       | 22            | 16       | 0       | 12            | 10       | 0       |
| fungus-type cell wall organization                     | 99            | 72       | 1       | 93            | 62       | 1       | 58            | 37       | 1       | 38            | 24       | 1       | 28            | 16       | 1       | 17            | 10       | 0       |
| conjugation                                            | 67            | 62       | 0       | 57            | 53       | 0       | 28            | 32       | 0       | 17            | 21       | 0       | 11            | 13       | 0       | 9             | 8        | 0       |
| cytokinesis                                            | 97            | 59       | 1       | 74            | 53       | 1       | 39            | 31       | 0       | 20            | 20       | 0       | 11            | 13       | 0       | 7             | 8        | 0       |
| cellular respiration                                   | 35            | 37       | 0       | 26            | 33       | 0       | 14            | 19       | 0       | 10            | 12       | 0       | 4             | 8        | 0       | 3             | 5        | 0       |
| cell budding                                           | 55            | 33       | 1       | 47            | 29       | 1       | 28            | 17       | 1       | 17            | 11       | 0       | 11            | 7        | 0       | 7             | 5        | 0       |
| protein folding                                        | 42            | 33       | 0       | 37            | 29       | 0       | 22            | 17       | 0       | 12            | 11       | 0       | 7             | 7        | 0       | 6             | 5        | 0       |
| cellular aromatic compound metabolic process           | 32            | 25       | 0       | 28            | 22       | 0       | 20            | 13       | 0       | 10            | 8        | 0       | 2             | 5        | 0       | 0             | 3        | 0       |
| vesicle organization                                   | 30            | 22       | 0       | 28            | 18       | 1       | 13            | 11       | 0       | 6             | 7        | 0       | 2             | 4        | 0       | 2             | 3        | 0       |
| nucleus organization                                   | 32            | 18       | 1       | 29            | 16       | 1       | 19            | 9        | 1       | 10            | 6        | 0       | 6             | 4        | 0       | 2             | 2        | 0       |
| pseudohyphal growth                                    | 18            | 17       | 0       | 17            | 15       | 0       | 13            | 9        | 0       | 8             | 5        | 0       | 4             | 4        | 0       | 1             | 2        | 0       |
| vacuole organization                                   | 15            | 16       | 0       | 12            | 14       | 0       | 6             | 8        | 0       | 3             | 5        | 0       | 3             | 3        | 0       | 2             | 2        | 0       |
| vitamin metabolic process                              | 30            | 16       | 1       | 29            | 14       | 1       | 19            | 8        | 1       | 14            | 5        | 2       | 8             | 3        | 1       | 8             | 2        | 2       |
| peroxisome organization                                | 19            | 15       | 0       | 18            | 13       | 0       | 14            | 8        | 1       | 13            | 5        | 2       | 8             | 3        | 1       | 6             | 2        | 1       |
| transposition                                          | 17            | 8        | 1       | 13            | 8        | 0       | 10            | 5        | 1       | 8             | 2        | 2       | 6             | 2        | 1       | 3             | 1        | 1       |

## (C) Cellular Component

|                    | Frequency > 4 |          |         | Frequency > 5 |          |         | Frequency > 6 |          |         | Frequency > 7 |          |         | Frequency > 8 |          |         | Frequency > 9 |          |         |
|--------------------|---------------|----------|---------|---------------|----------|---------|---------------|----------|---------|---------------|----------|---------|---------------|----------|---------|---------------|----------|---------|
|                    | observed      | expected | Z-score | observed      | expected | Z-score | observed      | expected | Z-score | observed      | expected | Z-score | observed      | expected | Z-score | observed      | expected | Z-score |
| cytoplasm          | 57286         | 52552    | 2       | 49763         | 45855    | 1       | 29789         | 27691    | 1       | 18760         | 17554    | 1       | 12332         | 11445    | 1       | 8449          | 7753     | 1       |
| nucleus            | 19899         | 15564    | 4       | 17566         | 13579    | 3       | 10826         | 8235     | 3       | 7017          | 5184     | 3       | 4625          | 3385     | 3       | 3200          | 2298     | 2       |
| cellular component | 5975          | 10883    | -5      | 5091          | 9511     | -5      | 3008          | 5720     | -5      | 1924          | 3635     | -4      | 1211          | 2372     | -3      | 795           | 1603     | -3      |
| membrane           | 7578          | 5646     | 3       | 6618          | 4893     | 3       | 4066          | 2967     | 3       | 2625          | 1884     | 2       | 1798          | 1227     | 2       |               |          |         |
