# Supplementary material for: The 3D Organization of the Yeast Genome Correlates with Co-Expression and Reflects Functional Relations between Genes
Source: PubMed Central journal article supplement (PMC3561378; doi:10.1371/journal.pone.0054699), 2013-01-31
Supplement: pone.0054699.s010.pdf [file pone.0054699.s010.pdf]

## GEO Expression Data

The following is a listing of the GEO accession numbers for 1496 gene expression microarray samples used in this work:

|          |          |          |          |          |          |
|----------|----------|----------|----------|----------|----------|
| GSM6711  | GSM6712  | GSM6713  | GSM6715  | GSM6717  | GSM6726  |
| GSM6728  | GSM6729  | GSM6730  | GSM6731  | GSM6732  | GSM6219  |
| GSM6220  | GSM6221  | GSM6222  | GSM6223  | GSM6224  | GSM6225  |
| GSM6226  | GSM7490  | GSM7491  | GSM7492  | GSM7493  | GSM7494  |
| GSM7495  | GSM7496  | GSM12761 | GSM12633 | GSM12754 | GSM12755 |
| GSM12756 | GSM24746 | GSM29920 | GSM29921 | GSM29922 | GSM29924 |
| GSM29926 | GSM29927 | GSM29929 | GSM29930 | GSM29932 | GSM29934 |
| GSM29936 | GSM29937 | GSM29939 | GSM29940 | GSM29942 | GSM29943 |
| GSM29945 | GSM29946 | GSM29948 | GSM29949 | GSM29951 | GSM27837 |
| GSM27838 | GSM27839 | GSM27840 | GSM27841 | GSM27842 | GSM27843 |
| GSM27844 | GSM27845 | GSM27846 | GSM27847 | GSM27848 | GSM27849 |
| GSM27850 | GSM27851 | GSM27852 | GSM27853 | GSM27854 | GSM31653 |
| GSM31654 | GSM31655 | GSM31656 | GSM31657 | GSM31658 | GSM31659 |
| GSM31660 | GSM31661 | GSM31662 | GSM31663 | GSM31664 | GSM29073 |
| GSM29077 | GSM29080 | GSM29083 | GSM29086 | GSM29089 | GSM29094 |
| GSM29098 | GSM29101 | GSM29104 | GSM29105 | GSM29106 | GSM29107 |
| GSM29108 | GSM29109 | GSM29110 | GSM34633 | GSM34634 | GSM34635 |
| GSM34678 | GSM34679 | GSM34680 | GSM34681 | GSM34682 | GSM34683 |
| GSM34684 | GSM34685 | GSM34686 | GSM34687 | GSM34688 | GSM34689 |
| GSM34690 | GSM34691 | GSM34692 | GSM34693 | GSM34694 | GSM34695 |
| GSM34696 | GSM34697 | GSM34698 | GSM34699 | GSM34700 | GSM34701 |
| GSM34752 | GSM34753 | GSM34754 | GSM34755 | GSM34756 | GSM34757 |
| GSM34758 | GSM34759 | GSM34760 | GSM34761 | GSM34762 | GSM34763 |
| GSM34764 | GSM34765 | GSM34766 | GSM12927 | GSM12928 | GSM12929 |
| GSM12930 | GSM12931 | GSM12932 | GSM35294 | GSM35295 | GSM35296 |
| GSM35297 | GSM35298 | GSM35299 | GSM35300 | GSM35301 | GSM35302 |
| GSM35303 | GSM35304 | GSM35305 | GSM35306 | GSM35307 | GSM35308 |
| GSM35309 | GSM35310 | GSM35311 | GSM35312 | GSM35313 | GSM35314 |
| GSM35315 | GSM35316 | GSM35317 | GSM35318 | GSM35319 | GSM35320 |
| GSM35321 | GSM34889 | GSM34890 | GSM34891 | GSM34892 | GSM35972 |
| GSM35973 | GSM35974 | GSM35975 | GSM35976 | GSM35977 | GSM15273 |
| GSM15275 | GSM15277 | GSM15279 | GSM15281 | GSM15283 | GSM37612 |
| GSM37613 | GSM37614 | GSM37615 | GSM37616 | GSM37617 | GSM37618 |
| GSM37619 | GSM37620 | GSM37621 | GSM37622 | GSM37623 | GSM37903 |
| GSM37904 | GSM37905 | GSM37906 | GSM37907 | GSM37908 | GSM40714 |
| GSM40715 | GSM40716 | GSM40717 | GSM40718 | GSM40719 | GSM40720 |
| GSM40721 | GSM40722 | GSM40723 | GSM40724 | GSM40725 | GSM40726 |
| GSM40727 | GSM40728 | GSM40729 | GSM40730 | GSM40731 | GSM40732 |
| GSM40733 | GSM40734 | GSM40735 | GSM40736 | GSM40737 | GSM43898 |
| GSM43899 | GSM43900 | GSM43901 | GSM43902 | GSM43903 | GSM43904 |
| GSM43905 | GSM43906 | GSM43907 | GSM43908 | GSM43909 | GSM49659 |
| GSM49660 | GSM49662 | GSM49663 | GSM49664 | GSM49665 | GSM48131 |
| GSM48132 | GSM48133 | GSM48134 | GSM48135 | GSM48136 | GSM48137 |
| GSM48138 | GSM48139 | GSM48140 | GSM48141 | GSM48142 | GSM48143 |
| GSM48144 | GSM48145 | GSM48146 | GSM48147 | GSM48148 | GSM48149 |

|           |           |           |           |           |           |
|-----------|-----------|-----------|-----------|-----------|-----------|
| GSM48150  | GSM48151  | GSM48152  | GSM48153  | GSM48154  | GSM48155  |
| GSM48156  | GSM48157  | GSM48158  | GSM48159  | GSM48160  | GSM48161  |
| GSM48162  | GSM43865  | GSM43866  | GSM43867  | GSM43868  | GSM43869  |
| GSM43897  | GSM50009  | GSM50010  | GSM50011  | GSM50012  | GSM51901  |
| GSM51902  | GSM51903  | GSM51904  | GSM51905  | GSM51906  | GSM51907  |
| GSM51908  | GSM51909  | GSM21640  | GSM21641  | GSM21642  | GSM21643  |
| GSM21644  | GSM21645  | GSM21646  | GSM21647  | GSM21648  | GSM21649  |
| GSM21650  | GSM21651  | GSM21652  | GSM21653  | GSM21654  | GSM21655  |
| GSM21656  | GSM21657  | GSM21658  | GSM21659  | GSM21660  | GSM21661  |
| GSM21662  | GSM21663  | GSM21664  | GSM21665  | GSM21666  | GSM21667  |
| GSM21668  | GSM21669  | GSM21670  | GSM21671  | GSM21672  | GSM21673  |
| GSM21674  | GSM21675  | GSM21676  | GSM21677  | GSM21678  | GSM21679  |
| GSM21680  | GSM21681  | GSM21682  | GSM21683  | GSM21684  | GSM21685  |
| GSM21686  | GSM21687  | GSM21688  | GSM21689  | GSM21690  | GSM21691  |
| GSM21692  | GSM21693  | GSM21694  | GSM21695  | GSM21696  | GSM21697  |
| GSM21698  | GSM21699  | GSM21700  | GSM21701  | GSM21702  | GSM21703  |
| GSM21704  | GSM21705  | GSM71925  | GSM71926  | GSM71927  | GSM71928  |
| GSM71929  | GSM71930  | GSM71931  | GSM71932  | GSM71933  | GSM71934  |
| GSM71935  | GSM45194  | GSM45279  | GSM45281  | GSM45282  | GSM45283  |
| GSM45284  | GSM77298  | GSM77299  | GSM77300  | GSM77301  | GSM77302  |
| GSM77303  | GSM77304  | GSM77305  | GSM77306  | GSM77307  | GSM77308  |
| GSM77309  | GSM77310  | GSM77311  | GSM77312  | GSM77313  | GSM77314  |
| GSM77315  | GSM77316  | GSM77317  | GSM77318  | GSM77319  | GSM77320  |
| GSM77321  | GSM77322  | GSM77323  | GSM77324  | GSM77325  | GSM77326  |
| GSM77327  | GSM77328  | GSM77329  | GSM77330  | GSM77331  | GSM77332  |
| GSM77333  | GSM87661  | GSM87662  | GSM87663  | GSM87664  | GSM87665  |
| GSM87666  | GSM87667  | GSM87668  | GSM87669  | GSM87670  | GSM87671  |
| GSM87672  | GSM87673  | GSM87674  | GSM87675  | GSM87676  | GSM75830  |
| GSM75831  | GSM75832  | GSM94403  | GSM94538  | GSM94539  | GSM94540  |
| GSM94555  | GSM94587  | GSM94589  | GSM94590  | GSM94591  | GSM94592  |
| GSM94593  | GSM94594  | GSM94595  | GSM94596  | GSM88277  | GSM88278  |
| GSM88279  | GSM88280  | GSM88281  | GSM65640  | GSM66919  | GSM66920  |
| GSM66921  | GSM66922  | GSM66923  | GSM86746  | GSM86747  | GSM86748  |
| GSM86749  | GSM86750  | GSM86751  | GSM86752  | GSM86753  | GSM86755  |
| GSM86756  | GSM86757  | GSM86758  | GSM86759  | GSM86761  | GSM86762  |
| GSM86763  | GSM86764  | GSM86767  | GSM86768  | GSM86769  | GSM108368 |
| GSM108369 | GSM108370 | GSM108392 | GSM108393 | GSM108394 | GSM98594  |
| GSM98595  | GSM98596  | GSM98597  | GSM98598  | GSM98599  | GSM105139 |
| GSM105143 | GSM105145 | GSM105146 | GSM60930  | GSM60931  | GSM60932  |
| GSM60933  | GSM60934  | GSM60935  | GSM119751 | GSM119752 | GSM119753 |
| GSM119754 | GSM119755 | GSM119756 | GSM119757 | GSM119758 | GSM105333 |
| GSM105334 | GSM105335 | GSM105336 | GSM105337 | GSM105338 | GSM105339 |
| GSM105340 | GSM105341 | GSM105342 | GSM105343 | GSM105344 | GSM67545  |
| GSM67546  | GSM67547  | GSM67548  | GSM67549  | GSM67550  | GSM67551  |
| GSM67552  | GSM67553  | GSM67554  | GSM67555  | GSM67556  | GSM67557  |
| GSM67558  | GSM67559  | GSM67560  | GSM67561  | GSM67562  | GSM67563  |
| GSM67564  | GSM67565  | GSM67566  | GSM67567  | GSM67568  | GSM67569  |
| GSM67570  | GSM67571  | GSM67572  | GSM67573  | GSM67574  | GSM67575  |
| GSM67576  | GSM67577  | GSM67578  | GSM67579  | GSM67580  | GSM67581  |
| GSM67582  | GSM67583  | GSM67584  | GSM67585  | GSM67586  | GSM67587  |
| GSM67588  | GSM67589  | GSM67590  | GSM67591  | GSM67592  | GSM67593  |
| GSM67594  | GSM67595  | GSM67596  | GSM67597  | GSM67598  | GSM67599  |
| GSM67600  | GSM67601  | GSM67602  | GSM67603  | GSM67604  | GSM67605  |
| GSM67606  | GSM67607  | GSM67608  | GSM67609  | GSM67610  | GSM67611  |

|           |           |           |           |           |           |
|-----------|-----------|-----------|-----------|-----------|-----------|
| GSM67612  | GSM67613  | GSM67614  | GSM67615  | GSM67616  | GSM67617  |
| GSM67618  | GSM67619  | GSM67620  | GSM67621  | GSM67622  | GSM67623  |
| GSM67624  | GSM67625  | GSM67626  | GSM67627  | GSM67628  | GSM67629  |
| GSM67630  | GSM67631  | GSM67632  | GSM67633  | GSM67634  | GSM67635  |
| GSM67636  | GSM67637  | GSM67638  | GSM67639  | GSM67640  | GSM120128 |
| GSM120129 | GSM120130 | GSM120131 | GSM120132 | GSM120133 | GSM120134 |
| GSM120135 | GSM120136 | GSM120138 | GSM120139 | GSM120143 | GSM120144 |
| GSM120145 | GSM140786 | GSM140800 | GSM140801 | GSM140802 | GSM140803 |
| GSM140804 | GSM140805 | GSM140808 | GSM140809 | GSM140810 | GSM140811 |
| GSM140812 | GSM153907 | GSM153908 | GSM153909 | GSM153910 | GSM153911 |
| GSM153912 | GSM153913 | GSM153914 | GSM153915 | GSM153916 | GSM154157 |
| GSM154623 | GSM154627 | GSM154628 | GSM154629 | GSM154631 | GSM143071 |
| GSM143073 | GSM143076 | GSM143077 | GSM143079 | GSM143081 | GSM143082 |
| GSM143083 | GSM143084 | GSM143085 | GSM143088 | GSM143089 | GSM142982 |
| GSM142983 | GSM142984 | GSM142985 | GSM142986 | GSM142987 | GSM120137 |
| GSM120140 | GSM120141 | GSM120142 | GSM137676 | GSM137677 | GSM137678 |
| GSM137679 | GSM137680 | GSM137681 | GSM137682 | GSM137683 | GSM137684 |
| GSM137685 | GSM137686 | GSM137687 | GSM147746 | GSM147747 | GSM147748 |
| GSM147749 | GSM147750 | GSM147751 | GSM147753 | GSM147754 | GSM147755 |
| GSM147759 | GSM147761 | GSM147762 | GSM137823 | GSM137824 | GSM137825 |
| GSM137826 | GSM137827 | GSM137828 | GSM137829 | GSM137830 | GSM137831 |
| GSM137832 | GSM137833 | GSM137834 | GSM137835 | GSM137836 | GSM137837 |
| GSM137838 | GSM137839 | GSM137840 | GSM137841 | GSM137842 | GSM137843 |
| GSM137844 | GSM137845 | GSM137846 | GSM137847 | GSM137848 | GSM137849 |
| GSM137850 | GSM137851 | GSM137852 | GSM137853 | GSM137854 | GSM137855 |
| GSM137856 | GSM137857 | GSM137858 | GSM137859 | GSM137860 | GSM137861 |
| GSM137862 | GSM137863 | GSM137864 | GSM137865 | GSM137866 | GSM137867 |
| GSM137868 | GSM137869 | GSM137870 | GSM137871 | GSM137872 | GSM137873 |
| GSM137874 | GSM137875 | GSM137876 | GSM137877 | GSM137878 | GSM137879 |
| GSM137880 | GSM137881 | GSM137882 | GSM137883 | GSM137884 | GSM137885 |
| GSM137886 | GSM137887 | GSM137888 | GSM137889 | GSM137890 | GSM137891 |
| GSM137892 | GSM153627 | GSM153628 | GSM153629 | GSM153630 | GSM153631 |
| GSM153632 | GSM153633 | GSM153634 | GSM206381 | GSM206382 | GSM206383 |
| GSM206384 | GSM206385 | GSM206386 | GSM206387 | GSM206388 | GSM206389 |
| GSM206390 | GSM206391 | GSM206392 | GSM206393 | GSM206394 | GSM206395 |
| GSM207569 | GSM207570 | GSM207571 | GSM207572 | GSM207573 | GSM207574 |
| GSM207575 | GSM207576 | GSM146301 | GSM146302 | GSM146303 | GSM146304 |
| GSM146305 | GSM146306 | GSM146316 | GSM146317 | GSM146318 | GSM146319 |
| GSM146320 | GSM146321 | GSM146322 | GSM146323 | GSM146324 | GSM146325 |
| GSM146326 | GSM146327 | GSM146328 | GSM146329 | GSM225399 | GSM225400 |
| GSM225401 | GSM225402 | GSM225403 | GSM225404 | GSM225405 | GSM225406 |
| GSM225407 | GSM225461 | GSM225463 | GSM225466 | GSM225467 | GSM225468 |
| GSM225469 | GSM225482 | GSM225514 | GSM225515 | GSM225516 | GSM225517 |
| GSM225519 | GSM225520 | GSM225521 | GSM216549 | GSM216550 | GSM216551 |
| GSM216552 | GSM176869 | GSM176894 | GSM176895 | GSM176896 | GSM176898 |
| GSM176900 | GSM176901 | GSM176902 | GSM176903 | GSM172916 | GSM172917 |
| GSM172918 | GSM172919 | GSM172920 | GSM172921 | GSM172922 | GSM172923 |
| GSM198364 | GSM198365 | GSM198366 | GSM198367 | GSM198368 | GSM198369 |
| GSM200685 | GSM200686 | GSM200687 | GSM200688 | GSM200689 | GSM200690 |
| GSM200691 | GSM200692 | GSM200693 | GSM234643 | GSM234644 | GSM234645 |
| GSM184944 | GSM184945 | GSM184946 | GSM184947 | GSM184948 | GSM184949 |
| GSM184950 | GSM184951 | GSM184952 | GSM184953 | GSM184954 | GSM184955 |
| GSM184956 | GSM184957 | GSM184958 | GSM184959 | GSM184960 | GSM184961 |
| GSM184962 | GSM184963 | GSM184964 | GSM184965 | GSM184966 | GSM184967 |

|           |           |           |           |           |           |
|-----------|-----------|-----------|-----------|-----------|-----------|
| GSM184968 | GSM184969 | GSM184970 | GSM184971 | GSM184972 | GSM184973 |
| GSM184974 | GSM184975 | GSM184976 | GSM184977 | GSM184978 | GSM184979 |
| GSM184980 | GSM184981 | GSM184982 | GSM184983 | GSM184984 | GSM184985 |
| GSM184986 | GSM184987 | GSM184988 | GSM184989 | GSM184990 | GSM184991 |
| GSM239654 | GSM239655 | GSM239656 | GSM239657 | GSM239658 | GSM239659 |
| GSM239660 | GSM239661 | GSM240641 | GSM240642 | GSM240643 | GSM240644 |
| GSM240645 | GSM240646 | GSM240647 | GSM240648 | GSM240649 | GSM240650 |
| GSM240651 | GSM240652 | GSM240653 | GSM240654 | GSM240655 | GSM240656 |
| GSM240657 | GSM240658 | GSM240659 | GSM240660 | GSM240661 | GSM240662 |
| GSM240663 | GSM240664 | GSM240665 | GSM240666 | GSM240667 | GSM240668 |
| GSM240669 | GSM240670 | GSM240671 | GSM240672 | GSM240673 | GSM240674 |
| GSM240675 | GSM240676 | GSM240677 | GSM240678 | GSM240679 | GSM240680 |
| GSM240713 | GSM240714 | GSM240715 | GSM240716 | GSM240717 | GSM240718 |
| GSM240719 | GSM240720 | GSM217395 | GSM217616 | GSM217617 | GSM217618 |
| GSM217621 | GSM217633 | GSM217634 | GSM217635 | GSM217636 | GSM217637 |
| GSM217638 | GSM217639 | GSM217640 | GSM217641 | GSM217642 | GSM217643 |
| GSM217745 | GSM217746 | GSM217747 | GSM217748 | GSM217749 | GSM217750 |
| GSM217751 | GSM217752 | GSM241146 | GSM241147 | GSM241148 | GSM241149 |
| GSM241150 | GSM241151 | GSM241152 | GSM241153 | GSM118581 | GSM118582 |
| GSM118583 | GSM118584 | GSM118585 | GSM118586 | GSM118587 | GSM118588 |
| GSM118589 | GSM118590 | GSM118591 | GSM118592 | GSM29912  | GSM29914  |
| GSM29917  | GSM147756 | GSM147757 | GSM147758 | GSM242654 | GSM242655 |
| GSM242660 | GSM242661 | GSM242662 | GSM242665 | GSM236941 | GSM236942 |
| GSM236943 | GSM236944 | GSM236945 | GSM236946 | GSM236947 | GSM236948 |
| GSM236949 | GSM236950 | GSM236951 | GSM236952 | GSM236953 | GSM236954 |
| GSM236955 | GSM236956 | GSM236957 | GSM236958 | GSM189732 | GSM189733 |
| GSM189734 | GSM189735 | GSM189736 | GSM189737 | GSM189738 | GSM189739 |
| GSM189740 | GSM189741 | GSM189742 | GSM189743 | GSM254979 | GSM254980 |
| GSM254981 | GSM254982 | GSM254768 | GSM254769 | GSM254770 | GSM254771 |
| GSM254772 | GSM254773 | GSM266723 | GSM266724 | GSM266725 | GSM266726 |
| GSM266728 | GSM266729 | GSM211831 | GSM211832 | GSM211833 | GSM211834 |
| GSM211835 | GSM211836 | GSM211837 | GSM211838 | GSM211839 | GSM211840 |
| GSM211841 | GSM211842 | GSM211843 | GSM211844 | GSM211845 | GSM211846 |
| GSM211847 | GSM211848 | GSM211849 | GSM211850 | GSM211851 | GSM137497 |
| GSM137498 | GSM137675 | GSM209972 | GSM209973 | GSM209974 | GSM209975 |
| GSM209976 | GSM209977 | GSM209978 | GSM209979 | GSM209980 | GSM209981 |
| GSM209982 | GSM209983 | GSM209984 | GSM209985 | GSM243561 | GSM243562 |
| GSM243563 | GSM243564 | GSM243565 | GSM243566 | GSM243567 | GSM243568 |
| GSM243569 | GSM243570 | GSM243571 | GSM243572 | GSM243573 | GSM243574 |
| GSM243575 | GSM243631 | GSM243632 | GSM243633 | GSM243634 | GSM243635 |
| GSM243636 | GSM243637 | GSM243638 | GSM243639 | GSM243640 | GSM243641 |
| GSM202390 | GSM202391 | GSM202392 | GSM202393 | GSM202394 | GSM202395 |
| GSM202396 | GSM202397 | GSM202398 | GSM202399 | GSM225566 | GSM225571 |
| GSM225577 | GSM225579 | GSM225583 | GSM138684 | GSM138685 | GSM138686 |
| GSM138687 | GSM138688 | GSM138689 | GSM138690 | GSM138691 | GSM138692 |
| GSM138693 | GSM283150 | GSM283151 | GSM283152 | GSM283153 | GSM283154 |
| GSM283155 | GSM283156 | GSM283157 | GSM283158 | GSM254433 | GSM254434 |
| GSM254435 | GSM254436 | GSM254438 | GSM254443 | GSM254444 | GSM254445 |
| GSM254446 | GSM206793 | GSM206794 | GSM206795 | GSM206796 | GSM206797 |
| GSM206798 | GSM320738 | GSM320760 | GSM320761 | GSM320762 | GSM322926 |
| GSM322927 | GSM322936 | GSM323150 | GSM323151 | GSM323152 | GSM323153 |
| GSM323155 | GSM323156 | GSM323158 | GSM323159 | GSM323160 | GSM323161 |
| GSM323162 | GSM323163 | GSM304520 | GSM304521 | GSM304531 | GSM304532 |
| GSM306018 | GSM306019 | GSM306020 | GSM306021 | GSM306022 | GSM306023 |

|           |           |           |           |           |           |
|-----------|-----------|-----------|-----------|-----------|-----------|
| GSM306024 | GSM306025 | GSM306026 | GSM306027 | GSM306028 | GSM306029 |
| GSM346651 | GSM346652 | GSM346653 | GSM346654 | GSM265821 | GSM265822 |
| GSM265823 | GSM265824 | GSM265825 | GSM265826 | GSM265827 | GSM265828 |
| GSM265829 | GSM265830 | GSM265831 | GSM265832 | GSM265833 | GSM265834 |
| GSM265835 | GSM265836 | GSM265837 | GSM265838 | GSM265839 | GSM265840 |
| GSM265841 | GSM265842 | GSM265843 | GSM265844 | GSM265845 | GSM350771 |
| GSM350772 | GSM277242 | GSM277243 | GSM277244 | GSM277245 | GSM277250 |
| GSM277251 | GSM283692 | GSM283693 | GSM283694 | GSM283695 | GSM283696 |
| GSM283697 | GSM283698 | GSM283699 | GSM283700 | GSM283868 | GSM283869 |
| GSM283870 | GSM283871 | GSM283872 | GSM283873 | GSM283897 | GSM283898 |
| GSM283899 | GSM283900 | GSM283901 | GSM283903 | GSM284058 | GSM284059 |
| GSM284060 | GSM284061 | GSM290691 | GSM290692 | GSM290744 | GSM290745 |
| GSM290746 | GSM291100 | GSM291103 | GSM291104 | GSM291105 | GSM291106 |
| GSM291107 | GSM291340 | GSM291341 | GSM291342 | GSM291343 | GSM291344 |
| GSM291345 | GSM291346 | GSM291347 | GSM291348 | GSM291349 | GSM291350 |
| GSM291351 | GSM291418 | GSM291419 | GSM291420 | GSM291431 | GSM291432 |
| GSM291448 | GSM291449 | GSM296157 | GSM296158 | GSM296159 | GSM317639 |
| GSM317647 | GSM317837 | GSM317838 | GSM317839 | GSM317840 | GSM253508 |
| GSM253509 | GSM253510 | GSM253511 | GSM253512 | GSM253513 | GSM253514 |
| GSM253515 | GSM253516 | GSM253517 | GSM253518 | GSM253519 | GSM253520 |
| GSM253521 | GSM253522 | GSM253523 | GSM253524 | GSM253525 | GSM253526 |
| GSM253527 | GSM253528 | GSM253529 | GSM299685 | GSM299686 | GSM299687 |
| GSM299688 | GSM299689 | GSM299690 | GSM299697 | GSM299698 | GSM299774 |
| GSM299775 | GSM299776 | GSM299777 | GSM313535 | GSM313536 | GSM313537 |
| GSM313538 | GSM313539 | GSM313540 | GSM215115 | GSM215116 | GSM215117 |
| GSM215119 | GSM215121 | GSM215122 | GSM215129 | GSM215130 | GSM381326 |
| GSM381327 | GSM381328 | GSM381329 | GSM381330 | GSM381331 | GSM381332 |
| GSM381333 | GSM381334 | GSM381335 | GSM381336 | GSM381337 | GSM381338 |
| GSM387533 | GSM387534 | GSM387535 | GSM387536 | GSM387537 | GSM387538 |
| GSM387539 | GSM387540 | GSM387541 | GSM387542 | GSM387543 | GSM387544 |
| GSM451048 | GSM451049 | GSM451050 | GSM451051 | GSM453346 | GSM453347 |
| GSM453348 | GSM453349 | GSM453350 | GSM440152 | GSM440153 | GSM440154 |
| GSM440155 | GSM440156 | GSM440195 | GSM440196 | GSM440197 | GSM452841 |
| GSM452842 | GSM452843 | GSM452844 | GSM452845 | GSM452846 | GSM452847 |
| GSM452848 | GSM452849 | GSM452850 | GSM452851 | GSM452852 | GSM452853 |
| GSM452854 | GSM452855 | GSM452856 | GSM452857 | GSM452858 | GSM452859 |
| GSM452860 | GSM452861 | GSM452862 | GSM452863 | GSM452864 | GSM452865 |
| GSM452866 | GSM452867 | GSM452868 | GSM452869 | GSM452870 | GSM452871 |
| GSM452872 | GSM452873 | GSM452874 | GSM452875 | GSM452876 | GSM452877 |
| GSM452878 | GSM452879 | GSM452880 | GSM452881 | GSM452882 | GSM377493 |
| GSM377494 | GSM377495 | GSM377496 | GSM377497 | GSM377498 | GSM377499 |
| GSM474474 | GSM474475 | GSM474864 | GSM474865 | GSM474866 | GSM474867 |
